# Supplementary material
Source: HighWire-hosted journal article supplement (https://jech.bmj.com/content/71/3/239)
Supplement: inline-supplementary-material-1 [file inline-supplementary-material-1.pdf]

**Supplementary material:**

**1. Preventable and non-preventable causes of death classification and its ICD-10 codes.**

|                                           | <b>Causes of death</b>                                     | <b>ICD-10 codes</b>            | <b>Typology</b> |
|-------------------------------------------|------------------------------------------------------------|--------------------------------|-----------------|
| Preventable                               | Cancer of oral cavity, pharynx, and esophagus              | C00-C15                        | B               |
|                                           | Cancer larynx                                              | C32                            | B               |
|                                           | Cancer of trachea, bronchus and lung                       | C33-C34                        | B               |
|                                           | Diabetes Mellitus                                          | E10-E14                        | B               |
|                                           | Chronic Obstructive Pulmonary Disease                      | J40-J44, J47                   | B               |
|                                           | Cancer of breast                                           | C50                            | M               |
|                                           | Cancer of prostate                                         | C61                            | M               |
|                                           | Hodgkin's disease and leukemia                             | C81, C91-C95                   | M               |
|                                           | Appendicitis, hernia and peptic ulcer                      | K25–K28, K35–K38, K40–K46, K56 | M               |
|                                           | Cancer of cervix                                           | C53                            | B/M             |
|                                           | Hypertensive disease                                       | I10-I15                        | B/M             |
|                                           | Ischemic heart disease                                     | I20-I25                        | B/M             |
|                                           | Cerebrovascular disease                                    | I60-I69                        | B/M             |
|                                           | Road traffic accidents                                     | V01-V89, Y85                   | I               |
|                                           | Accidental falls                                           | W00-W19                        | I               |
|                                           | Suicide                                                    | X60-X84, Y87.0                 | I               |
|                                           | Mental and behavioral disorders due to use of psychotropic | F10, F11-F16, F18, F19         | A               |
|                                           | Alcoholic cardiomyopathy                                   | I42.6                          | A               |
|                                           | Pancreatitis                                               | K85-K86.0                      | A               |
|                                           | Accidental poisoning by and exposure to certain substances | X41, X42, X44, X45             | P               |
| Certain infectious and parasitic diseases | A00-B99, R75, U04.9                                        | IP                             |                 |
| Non-Preventable                           | Cancer of stomach                                          | C16                            | N               |
|                                           | Cancer of colorectum                                       | C18-C21                        | N               |
|                                           | Cancer of liver                                            | C22.0, C22.1, C22.9            | N               |
|                                           | Cancer of kidney and bladder                               | C64-C68                        | N               |
|                                           | Cancer of pancreas                                         | C25                            | N               |
|                                           | Other liver and gall bladder diseases                      | K71-K79, K84, K86.1-K87        | N               |
| Total mortality                           | All-causes of death                                        | All-Codes from ICD-10          |                 |

Adapted from Mackenbach et al. (2014).

**B**=Prevention through behavioral change; **M**= Prevention by medical intervention; **B/M**= Prevention through behavioral change + medical intervention; **I**=injuries; **A**= related to alcohol and other substances consumption; **P**= Poisoning; **IP**= infectious and parasitic diseases; **N**=No preventable causes of death.

**2. Observed and expected mortality among men and women (20 -69 years old) living in experimental and comparison areas by period.**

| Comparison neighbourhoods                     |           |         |           |         |           |        |           |        |
|-----------------------------------------------|-----------|---------|-----------|---------|-----------|--------|-----------|--------|
|                                               | Men       |         |           |         | Women     |        |           |        |
|                                               | 2002-2004 |         | 2008-2010 |         | 2002-2004 |        | 2008-2010 |        |
|                                               | O         | E       | O         | E       | O         | E      | O         | E      |
| Preventable (all)                             | 705       | 689.21  | 643       | 725.69  | 227       | 252.87 | 227       | 263.86 |
| Preventable-restricted                        | 366       | 361.51  | 338       | 377.85  | 122       | 128.77 | 97        | 132.72 |
| No-Preventable                                | 218       | 198.15  | 196       | 212.04  | 78        | 83.72  | 97        | 88.19  |
| Total                                         | 1337      | 1263.22 | 1210      | 1333.36 | 533       | 581.19 | 575       | 606.07 |
| Experimental neighbourhoods (1 project)       |           |         |           |         |           |        |           |        |
|                                               | Men       |         |           |         | Women     |        |           |        |
|                                               | 2002-2004 |         | 2008-2010 |         | 2002-2004 |        | 2008-2010 |        |
|                                               | O         | E       | O         | E       | O         | E      | O         | E      |
| Preventable (all)                             | 683       | 484.28  | 561       | 496.87  | 227       | 177.27 | 188       | 179.47 |
| Preventable-restricted                        | 366       | 254.92  | 288       | 261.13  | 129       | 90.87  | 100       | 90.59  |
| No-Preventable                                | 181       | 138.54  | 183       | 143.81  | 56        | 58.72  | 63        | 59.63  |
| Total                                         | 1197      | 886.89  | 1061      | 912.08  | 500       | 408.11 | 452       | 411.95 |
| Experimental neighbourhoods (project overlap) |           |         |           |         |           |        |           |        |
|                                               | Men       |         |           |         | Women     |        |           |        |
|                                               | 2002-2004 |         | 2008-2010 |         | 2002-2004 |        | 2008-2010 |        |
|                                               | O         | E       | O         | E       | O         | E      | O         | E      |
| Preventable (all)                             | 430       | 270.73  | 351       | 281.41  | 151       | 99.58  | 101       | 100.63 |
| Preventable-restricted                        | 247       | 144.08  | 178       | 149.50  | 87        | 51.17  | 61        | 50.74  |
| No-Preventable                                | 120       | 76.51   | 108       | 80.49   | 39        | 32.76  | 44        | 33.09  |
| Total                                         | 765       | 495.14  | 709       | 515.94  | 345       | 228.98 | 265       | 230.28 |

O: Observed mortality; E: Expected mortality.

**3. Distribution of causes (%) on total mortality observed during 2002-2010 by neighborhood type.**

| Cause of death         | Men                       |                             |                              | Women                     |                             |                              |
|------------------------|---------------------------|-----------------------------|------------------------------|---------------------------|-----------------------------|------------------------------|
|                        | Comparison<br>(0 Project) | Experimental<br>(1 Project) | Experimental<br>(≥2 Project) | Comparison<br>(0 Project) | Experimental<br>(1 Project) | Experimental<br>(≥2 Project) |
| Preventable (all)      | 52%                       | 55%                         | 54%                          | 43%                       | 45%                         | 43%                          |
| Preventable-restricted | 28%                       | 29%                         | 29%                          | 20%                       | 24%                         | 24%                          |
| Less-preventable       | 16%                       | 16%                         | 16%                          | 15%                       | 13%                         | 13%                          |

Notice: the total percentage not sum 100% because there are causes of death not included in both groups.

#### 4. Evolution of indicators between intervened and comparison areas.

|                                                             | Comparison neighborhoods |      |                    | Experimental neighborhoods<br>(1 project) |      |                 | Experimental neighborhoods<br>(≥2 Project) |      |                    |
|-------------------------------------------------------------|--------------------------|------|--------------------|-------------------------------------------|------|-----------------|--------------------------------------------|------|--------------------|
|                                                             | 2001                     | 2011 | Differences<br>(%) | 2001                                      | 2011 | Differences (%) | 2001                                       | 2011 | Differences<br>(%) |
| Socioeconomic position (middle-class) (%)                   | 47.6                     | 53.2 | 5.6***             | 45.3                                      | 51.6 | 6.3***          | 45.9                                       | 51.5 | 5.6***             |
| Buildings in good condition (%)                             | 88.4                     | 89.7 | 1.3                | 82.9                                      | 86.3 | 3.4             | 78.6                                       | 80.4 | 1.8                |
| Dwellings in buildings with running water (%)               | 99.6                     | 99.9 | 0.3**              | 98.4                                      | 99.7 | 1.3             | 99.0                                       | 99.8 | 0.8**              |
| Homes without barriers (%)                                  | 19.3                     | 35.4 | 16.1***            | 14.2                                      | 29.5 | 15.3***         | 18.5                                       | 38.8 | 20.3**             |
| Young (aged 20-34) with compulsory education<br>(% total)   | 81.8                     | 88.3 | 6.5**              | 73.6                                      | 81.9 | 8.3**           | 69.3                                       | 76.2 | 7.0                |
| Young (aged 20-34) with compulsory education<br>(% women)   | 84.2                     | 91.2 | 7.0***             | 75.3                                      | 85.8 | 10.4***         | 70.4                                       | 76.6 | 6.2                |
| Young (aged 20-34) with a university education<br>(% total) | 19.9                     | 25.1 | 5.2*               | 13.4                                      | 20.2 | 6.8*            | 12.6                                       | 16.1 | 3.5                |
| Labor activity rate of women (%)                            | 40.3                     | 59.1 | 18.8***            | 38.4                                      | 57.9 | 19.5***         | 38.5                                       | 61.3 | 22.7***            |

Source: Spanish Census of Population and Housing 2001 and 2011.

\*\*\* p<0.001; \*\* p<0.01; p<0.05 from  $\chi^2$  test comparing 2001 and 2011 groups.
